# Supplementary material for: Determining the link between psoriasis and Crohn's disease using bioinformatics and systems biology approaches
Source: Research Square preprint supplement (doi:10.21203/rs.3.rs-4131605/v1), 2024-04-04
Supplement: Supplementary file 1 [file 4557f23e2df74332bc5cfe69.xlsx]

## Sheet: S1
Table S1: Summary of included studies.
Dataset name	Platform/GEO accession number	Sample size	Title	PMID
GSE114286	GPL17303/Ion Torrent Proton (Homo sapiens)	27	Comprehensive transcriptome anaylsis of psoriasis in a Han Chinese population	30341238
GSE95095	GPL14951/Illumina HumanHT-12 WG-DASL V4.0 R2 expression beadchip	60	Differential Gene Expression between involved and uninvolved sites of Crohn’s disease: Insights into a Distinctive Pathogenesis Profile	NA
GSE182740	GPL570/[HG-U133_Plus_2] Affymetrix Human Genome U133 Plus 2.0 Array	75	Genomic profiling of the overlap phenotype between psoriasis and atopic dermatitis	37419444
GSE52746	GPL17996/[HG-U133_Plus_2] Affymetrix Human Genome U133 Plus 2.0 Array (custom CDF: HGU133Plus2_Hs_ENTREZG.cdf version 15.1.0)	39	Expression data from intestinal mucosa of patients with CD under anti-TNF-alpha therapy.	24700437

## Sheet: S2
Table S2: Relative classification of immune cells.
GSE95095
celltype	GSM2496058	GSM2496059	GSM2496060	GSM2496061	GSM2496062	GSM2496063	GSM2496064	GSM2496065	GSM2496066	GSM2496067	GSM2496068	GSM2496069	GSM2496070	GSM2496071	GSM2496072	GSM2496073	GSM2496074	GSM2496075	GSM2496076	GSM2496077	GSM2496078	GSM2496079	GSM2496080	GSM2496081	GSM2496106	GSM2496107	GSM2496108	GSM2496109	GSM2496110	GSM2496111	GSM2496112	GSM2496113	GSM2496114	GSM2496115	GSM2496116	GSM2496117
B cells naive	0.194784	0	0	0.0132708	0.0912866	0.0194624	0.0243984	0.0170184	0.00893107	0	0	0.0257662	0	0.171903	0.0528373	0.00296534	0	0.0307346	0	0.078919	0	0	0.00999464	0.00133014	0	0.156122	0.0130528	0.0223443	0.0787385	0.0132321	0.0179905	0.0309562	0.0198765	0.149672	0	0.0214301
B cells memory	0	0.0127028	0.14705	0.0622693	0	0	0.00385994	0.0343067	0	0.277133	0.0907251	0.0204943	0.227591	0.0680745	0	0	0.122175	0.271805	0.0649363	0	0.226321	0.0794061	0.0296813	0.0275	0	0.0546309	0	0	0.00681192	0	0	0.0400364	0.028991	0	0.0795436	0
Plasma cells	0.116375	0.234747	0.177639	0.162203	0.0465367	0.183253	0.0712421	0.0465622	0.0498697	0.0212469	0.0499504	0.0474214	0.307983	0.0563657	0.135035	0.0990038	0.131664	0.0874308	0.121965	0.104604	0.29575	0.0982531	0.127825	0.153341	0.146864	0.179591	0.206482	0.184178	0.0679451	0.0421194	0.0748236	0.0776749	0.138645	0.173897	0.0725775	0.0297902
T cells CD8	0.762422	0.0349385	0	0.00471514	0.035322	0.21062	0.0542916	0	0.0211566	0.245675	0.0577536	0	0.410497	0	0.438562	0.082123	0.0999598	0.241924	0.195624	0.110931	0.164018	0.0377843	0.113383	0	0.0482048	0.0168651	0	0.0784532	0	0.137862	0.00780272	0.0614752	0	0.0960956	0.0837864	0
T cells CD4 naive	0.0273288	0.104212	0	0	0.0447846	0	0.10299	0.204787	0	0.0998157	0.0492833	0	0	0	0.232512	0	0.262548	0.0321796	0.265551	0.246967	0	0.080321	0.0200398	0	0	0	0.00917764	0	0	0	0	0	0	0	0.0665257	0
T cells CD4 memory resting	0.0409939	0.392587	1.53614	0.536137	0.392437	1.01551	0.359057	0.324593	1.12527	0.452708	0.776412	0.950397	1.36059	0.828028	0	0.489567	0.224471	0.803883	0.249462	0.53867	0.534788	0.268498	0.577872	0.619976	0.562728	0.691486	0.790575	0.566272	0.894663	0.507396	0.604707	0.607866	0.674703	0.524075	0.538169	0.522694
T cells CD4 memory activated	0.155289	0.176782	0	0.0369112	0	0.0906089	0.20322	0.215097	0	0	0.23613	0	0	0.207526	0.161183	0.133017	0.0809711	0	0.141759	0	0	0	0.090353	0.167055	0	0	0.0299704	0	0.00816464	0.164665	0.0464908	0	0.0450246	0.0227477	0.0562793	0
T cells follicular helper	0	0	0	0	0	0.0149404	0	0	0	0	0	0.103245	0.0185757	0.214835	0	0	0	0	0	0	0.0554437	0	0	0	0	0	0	0.00822535	0	0	0	0.0105654	0	0	0	0
T cells regulatory (Tregs)	0.218478	0	0.169673	0.0234796	0.137251	0.137825	0	0	0.0328493	0	0	0.296321	0	0.456356	0.103361	0	0.0495833	0.0927644	0.0286328	0.052557	0	0.0214269	0.0783064	0	0	0.0566969	0.0126532	0.07319	0.0681975	0	0	0.114769	0.113813	0.132651	0.0202861	0.0106858
T cells gamma delta	0	0.0674907	0.110514	0.61637	0.143614	0.836085	0.132215	0.0869395	0.366773	1.28987	0.151168	1.29292	0.957175	0.106211	0.0900986	0.223685	0.228692	0.558222	0.164517	0.260293	0.488663	0.129976	0	0.209073	0.0878406	0.0774403	0.257951	0.0692503	0	0.463178	0.119502	0	0	0	0	0.226838
NK cells resting	0	0.0842586	0	0	0	0	0	0	0	0	0	0	0	0.653297	0	0.0139983	0	0	0	0	0	0	0	0.0373903	0.0918539	0	0.0538042	0	0.0400193	0	0	0	0.152182	0.0388347	0	0.0919955
NK cells activated	0.197039	0	0.514622	0.348964	0.0804989	0.326654	0.0535004	0.103378	0.0446332	0	0.179191	0.0771884	0.549978	0	0.120839	0	0.0564766	0.0785255	0.0733286	0.0777507	0.290498	0.104917	0.0465991	0	0	0	0.0332307	0.12414	0	0.0179492	0.0868975	0.133434	0	0.0579129	0.121664	0
Monocytes	0.216232	0.117048	0.128678	0.0144498	0.188654	0.0731168	0.295901	0.387603	1.36875	0	0.205837	0	0	0.457193	0.244182	0.171774	0.144684	0.106547	0.166886	0.195081	0.0446376	0.00804122	0.123219	0.148886	0.107533	0.0102214	0	0	0.0646714	0	0.0603384	0.054289	0.00659518	0.0819632	0.10042	0.139985
Macrophages M0	0.160294	0.133068	0.25398	0.00457872	0.0422617	0.0656428	0.203946	0.116855	0.72424	0.13342	0.238791	0.0468314	0.537102	0.212798	0	0	0.10803	0.274151	0.089622	0.107615	0.25357	0.156551	0.033945	0.0312596	0	0.125549	0	0.1708	0.0710332	0	0	0.0100789	0	0.0212465	0.0485234	0
Macrophages M1	0.0476634	0.0761852	0.0256389	0.0132379	0.042868	0.0231059	0.0029138	0.0541455	0.0102579	0.0481585	0.0197975	0.0484473	0.101371	0.0946298	0.0195901	0.0237048	0.0857771	0.027174	0.0993036	0.0555556	0.0190991	0.00247047	0.0127251	0.0412497	0.000352374	0.00517	0.000423322	0.0113118	0.0245429	0.023145	0.0132745	0.0120337	0.0123272	0.00300417	0.0834023	0.00591208
Macrophages M2	0.0269305	0.104224	0	0.11963	0.149294	0.0584305	0	0	0	0.0417943	0.100374	0.0615878	0.298191	0.134544	0.202274	0.087928	0.0880063	0.176762	0.0723649	0.00551178	0.136292	0.149459	0.101609	0.164492	0.14754	0.175594	0.15406	0.174199	0.0598874	0.18569	0.148371	0.0855693	0.0577553	0.156976	0.112124	0.0959714
Dendritic cells resting	0	0	0	0	0	0	0	0	0	0.125389	0	0.0207594	0	0.0266777	0.00641411	0	0	0	0	0.0128872	0	0	0	0	0.00375443	0	0.00987838	0	0.00818263	0.00496921	0.00403698	0.0178292	0.0271494	0.0155587	0	0.00950623
Dendritic cells activated	0.0118805	0.0923581	0.0130287	0.000319981	0.00816156	0	0.065963	0.0609761	0.0122271	0.0900791	0.0580732	0.0283611	0.0315175	0.0323082	0.0284827	0.0100917	0.0646576	0.0200752	0.0421323	0.00876079	0.045464	0.0319791	0.0164748	0.000568193	0.0240011	0.0119934	0.00942365	0.00368145	0.00174055	0.0194902	0.0127794	0.0262083	0.0203239	0.0289605	0.0219094	0.0125047
Mast cells resting	0.324905	0	0	0.152142	0.0962891	0	0	0	0	0	0.0782802	0.0242956	0	0	0.0387186	0.327698	0	0.284483	0.0719996	0	0.0547865	0.0666526	0.283231	0	0.175397	0.215127	0.0679018	0.251227	0.0728964	0.157786	0.11828	0.298373	0.0756633	0	0	0.224014
Mast cells activated	0.144296	0.209515	0.949291	0.0616625	0.166423	0.616172	0.573846	0.800976	1.47464	0.738803	0.174328	0.192427	0.542042	0.545971	0.318165	0.107235	0.563848	0.279224	0.266002	0.784753	0.342298	0.297032	0.0548027	0.415948	0.0468433	0.129277	0.0877711	0.0656646	0.180449	0.0684743	0.0937353	0.122892	0.178473	0.249276	0.33427	0.0334834
Eosinophils	0	0	0.00210319	0	0	0	0	0	0	0.0704373	0	0.0267357	0	0.0700258	0	0	0	0	0	0.0186944	0	0	0	0.0343477	0	0	0	0	0	0	0	0	0	0	0	0.0180995
Neutrophils	0	0.0616017	0.0330537	0	0.00357813	0	0.0841823	0.119797	0.098606	0.0830361	0	0.0268402	0.0601687	0	0	0.0166273	0.0131988	0	0.0032574	0	0.022504	0.0132847	0	0.00824198	0	0.0103292	0.0183088	0	0	0.000629591	0	0.00519035	0.00044248	0	0	0.0696574
Correlation	0.6607	0.756532	0.512943	0.772533	0.763941	0.580007	0.778266	0.734113	0.669154	0.536019	0.772136	0.58072	0.680816	0.442814	0.742555	0.745595	0.779347	0.707447	0.793421	0.575914	0.749505	0.661966	0.743182	0.733795	0.624243	0.644058	0.631929	0.674688	0.66688	0.763113	0.623784	0.605781	0.615594	0.564373	0.760838	0.668156
RMSE	0.779492	0.74741	0.857834	0.661261	0.728354	0.814316	0.710735	0.728833	0.762821	0.843587	0.719043	0.813791	0.752535	0.895824	0.739757	0.730058	0.714775	0.748417	0.711184	0.821963	0.718271	0.779686	0.738463	0.746177	0.801285	0.79511	0.786222	0.774413	0.768325	0.692467	0.797886	0.807863	0.801264	0.836944	0.724211	0.769557
Absolute score (sig.score)	2.64491	1.90172	4.06141	2.17034	1.66926	3.67142	2.23153	2.57303	5.3382	3.71756	2.46609	3.29004	5.40278	4.33674	2.19225	1.78942	2.32474	3.36589	2.11734	2.65955	2.97413	1.54605	1.72006	2.06066	1.44291	1.91609	1.75466	1.80294	1.64794	1.80659	1.40903	1.70924	1.55196	1.75287	1.73948	1.51257
GSE114286
celltype	NN1	NN5	NN7	NN8	NN10	NN11	NN12	NN13	NN19	PP1	PP2	PP3	PP4	PP5	PP6	PP7	PP8	PP9	PP10	PP11	PP12	PP13	PP14	PP15	PP16	PP17	PP20
B cells naive	0.0024131	0.00104724	0	0.00219931	0.00380503	0	0	0.000524138	0	0.0107732	0.0126152	0.0109839	0.0103087	0.00306841	0.000311314	0	0.00629868	0	0	0.0243681	0	0.00416183	0	0.00457649	0.0165435	0.00443179	0
B cells memory	0	0.0062143	0.0208339	0.00163473	0	0.00965263	0.00456355	0.00189638	0.00710285	0.00517149	0	0.00253942	0.0132843	0.00108501	0.00797997	0	0	0.0092749	0.00113538	0	0.00915474	0.0101527	0.00647627	0.00204131	0	0	0.00782999
Plasma cells	0.00174793	0	0.00305155	0	0	0.00119069	0	0	0.00113858	0	0	0	0	0	0	0.000916005	0	0	0	0	0.000343093	0	0.000142698	0	0.000264938	0	8.87e-05
T cells CD8	0.0471091	0.0406236	0.0841816	0.115941	0.0290576	0.101195	0.0175643	0.0357089	0.0123968	0.0523691	0.0342722	0.0353328	0.0508721	0.0255995	0.0156859	0.0190609	0.00744701	0.0477475	0.0308992	0.00133576	0.0316943	0.0382077	0.0422294	0.0289194	0.0615635	0.062614	0.0344738
T cells CD4 naive	0	0	0.0107099	0	0	0	0	0	0	0.00689526	0.0209471	0	0	0	0.0131851	0.0447778	0	0.000349476	0	0	0	0.00338345	0	0.028342	0	0	0
T cells CD4 memory resting	0.204757	0.19782	0.0159134	0.136829	0.149326	0.0635136	0.170804	0.238897	0.230583	0.122401	0.0473246	0.120325	0.130393	0.213949	0.21005	0.205934	0.157525	0.20461	0.192561	0.207816	0.201002	0.160458	0.173717	0.102879	0.145847	0.145184	0.18141
T cells CD4 memory activated	0.000114044	0	0.00503929	0	0	0	0	0.00770799	0.014805	0.00807573	0.03927	0.00763901	0.0383139	0.0197421	0.0390897	0.0221589	0.0192749	0.0264637	0.0276009	0.0332839	0.0171994	0.031993	0.0270936	0.0221998	0.0258713	0.0313705	0.0267817
T cells follicular helper	0.03883	0.0520568	0.005602	0.00225206	0.0238611	0.0556081	0.0102822	0	0	0.0168252	0.0259646	0	0.0159869	0.00808765	0	0	0.00665854	0.00899367	0	0.0154603	0	0.000405572	0	0.00596608	0.0306203	0.0134723	0
T cells regulatory (Tregs)	0.00389446	0.00206197	0.0035747	0.0293143	0.00308935	0.00320401	0	0	0	0.0331614	0.0452478	0.0296307	0.00878245	0	0	0	0.0123902	0.00197099	0	0	0	0.00136411	0	0.0261825	0.0317362	0	0
T cells gamma delta	0	0	0	0	0	0	0	0	0	0	0	0	0	0	0	0	0	0	0	0	0	0	0	0	0	0	0
NK cells resting	0.0296936	0.0465634	0.0853689	0.0496252	0	0.00428435	0.0233807	0.0296477	0.0402275	0.0426781	0.0318706	0.02685	0.0353513	0.0296944	0.0567346	0.0289465	0.0559545	0.01815	0.0509913	0.0626572	0.0642593	0.0695013	0.0324855	0.046984	0.0548558	0.0561839	0.0604699
NK cells activated	0.00288281	0	0	0.00087087	0.0327059	0.0106451	0	0	0	0	0.00267946	0	0	0.000603355	0	0.00326284	0	0.00509324	0	0	0	0	0	0	0	0	0
Monocytes	0.0270817	0.0568569	0.148142	0.0304369	0.00192221	0.0181387	0.0143712	0.0262174	0.0282636	0.0502466	0.0340408	0.0149095	0.0737618	0.0261927	0.0960859	0.119408	0.0273346	0.0296854	0.0494586	0.0178639	0.0212139	0.0559863	0.0434664	0.0366147	0.0155208	0.0258245	0.0445065
Macrophages M0	0.00677043	0.00957418	0.120189	0.0252228	0.0743119	0.00483184	0	0	0	0.0672541	0	0	0	0	0.0144394	0	0.0725424	0.0214061	0	0.0606273	0.0500566	0	0	0	0.0228287	0.000878268	0
Macrophages M1	0.00383037	0.00556324	0	0.00519211	0.0105094	0.0253149	0	0.00817954	0	0.0184006	0.0131451	0.00672607	0.00527223	0.0481155	0	0.0150688	0.0212733	0.0261221	0.0109353	0.0162185	0.0184854	0.0204852	0.0409134	0.020983	0.0269834	0.0131486	0.0103473
Macrophages M2	0.285405	0.32542	0.12179	0.278213	0.198908	0.244286	0.321417	0.277082	0.393073	0.233284	0.329088	0.356076	0.374195	0.329051	0.277342	0.308727	0.27933	0.341756	0.331096	0.248595	0.314157	0.411686	0.337645	0.430205	0.318539	0.332896	0.428154
Dendritic cells resting	0.0525598	0.04341	0.0551979	0.150546	0.232287	0.212385	0.21362	0.209116	0.0758966	0.0935616	0.142356	0.158854	0.0576062	0.103024	0.0220985	0.0597946	0.127187	0.0806143	0.0887386	0.109934	0.0611213	0.101277	0.0625493	0.0493948	0.0698565	0.0853061	0.0347276
Dendritic cells activated	0	0	0	0.0239917	0	0	0.0140883	0	0.0130251	0.0632284	0.0376206	0.0334219	0.0279733	0.00605499	0.0642133	0.0371339	0.0223167	0.0628853	0.0646318	0.0561974	0.0506162	0.0192152	0.0310145	0.0132539	0.0503253	0.0527775	0.0130097
Mast cells resting	0.29291	0.166473	0.182285	0.14773	0.240217	0.245749	0.209908	0.165023	0.18258	0.175174	0.183557	0.162951	0.152238	0.185733	0.0961494	0.122398	0.184468	0.109177	0.14153	0.121921	0.145645	0.0662064	0.16823	0.179161	0.125396	0.175912	0.141157
Mast cells activated	0	0.0339746	0	0	0	0	0	0	0	0	0	0	0	0	0.00342736	0	0	0	0	0.012131	0	0	0	0	0	0	0
Eosinophils	0	0	0.00721712	0	0	0	0	0	0	0	0	0.01927	0	0	0	0	0	0	0	0	0	0	0	0	0	0	0
Neutrophils	0	0.0123407	0.130904	0	0	0	0	0	0.000907213	0.00049981	0	0.0144897	0.00566121	0	0.0832069	0.0124127	0	0.00570021	0.010422	0.0115901	0.0150515	0.00551606	0.0340361	0.00229752	0.00324686	0	0.0170442
Correlation	0.508491	0.416258	0.665101	0.733438	0.408106	0.617969	0.630775	0.691568	0.761287	0.812797	0.821751	0.79478	0.802689	0.820097	0.810643	0.840992	0.750228	0.857071	0.744989	0.725012	0.802582	0.810747	0.716045	0.758516	0.776079	0.786615	0.796193
RMSE	0.865522	0.909141	0.78179	0.760216	0.913331	0.814912	0.80592	0.780016	0.737756	0.725897	0.715179	0.723183	0.723706	0.712471	0.719632	0.705211	0.750939	0.692254	0.756495	0.771137	0.724031	0.709228	0.769243	0.737188	0.741455	0.73365	0.716652

## Sheet: S3
Table S3: Results of GSEA enrichment analyses.
GSE114286				GSE95095						GSE114286				GSE95095
CXCR2										NAMPT
Term	ES	NES	FDR	Term	ES	NES	FDR			Term	ES	NES	FDR	Term	ES	NES	FDR
CELL_CYCLE	-0.6419	-1.7069	0.1498	ANTIGEN_PROCESSING_AND_PRESENTATION	0.6985	1.747	0.0618			P53_SIGNALING_PATHWAY	-0.5988	-1.7546	0.1648	UBIQUITIN_MEDIATED_PROTEOLYSIS	0.4441	1.8991	0.0478
NON_HOMOLOGOUS_END_JOINING	-0.7711	-1.7284	0.1626	PROTEASOME	0.6678	1.9496	0.0618			OOCYTE_MEIOSIS	-0.5406	-1.6009	0.3184	CYTOKINE_CYTOKINE_RECEPTOR_INTERACTION	0.6467	1.6516	0.0615
PYRIMIDINE_METABOLISM	-0.477	-1.6261	0.0941	NOD_LIKE_RECEPTOR_SIGNALING_PATHWAY	0.7458	1.7202	0.0631			UBIQUITIN_MEDIATED_PROTEOLYSIS	-0.5646	-1.6531	0.42	CHEMOKINE_SIGNALING_PATHWAY	0.6625	1.6638	0.0698
HOMOLOGOUS_RECOMBINATION	-0.6994	-1.7294	0.3236	PRION_DISEASES	0.6879	1.7577	0.0635			FOLATE_BIOSYNTHESIS	-0.6932	-1.6123	0.3498	COMPLEMENT_AND_COAGULATION_CASCADES	0.7283	1.672	0.0718
TOLL_LIKE_RECEPTOR_SIGNALING_PATHWAY	-0.5731	-1.6331	0.1096	TOLL_LIKE_RECEPTOR_SIGNALING_PATHWAY	0.7219	1.7637	0.0707			CELL_CYCLE	-0.6232	-1.6374	0.3418	LEISHMANIA_INFECTION	0.8381	1.6034	0.0753
FOLATE_BIOSYNTHESIS	-0.7083	-1.6359	0.1168	CYTOKINE_CYTOKINE_RECEPTOR_INTERACTION	0.6638	1.6637	0.0762			PYRIMIDINE_METABOLISM	-0.4499	-1.5219	0.2843	NOD_LIKE_RECEPTOR_SIGNALING_PATHWAY	0.7708	1.7785	0.0794
EPITHELIAL_CELL_SIGNALING_IN_HELICOBACTER_PYLORI_INFECTION	-0.5	-1.6296	0.0963	AUTOIMMUNE_THYROID_DISEASE	0.7723	1.6543	0.0783			RNA_DEGRADATION	-0.5782	-1.5964	0.2822	SMALL_CELL_LUNG_CANCER	0.526	1.6805	0.0805
DNA_REPLICATION	-0.6981	-1.6569	0.1768	PATHWAYS_IN_CANCER	0.429	1.6644	0.0811			EPITHELIAL_CELL_SIGNALING_IN_HELICOBACTER_PYLORI_INFECTION	-0.4877	-1.5819	0.2493	SYSTEMIC_LUPUS_ERYTHEMATOSUS	0.8397	1.554	0.0883
PROTEASOME	-0.6571	-1.6923	0.1369	COMPLEMENT_AND_COAGULATION_CASCADES	0.7676	1.7643	0.0842			PURINE_METABOLISM	-0.4136	-1.4623	0.3345	CELL_ADHESION_MOLECULES_CAMS	0.6601	1.5637	0.0889
UBIQUITIN_MEDIATED_PROTEOLYSIS	-0.5531	-1.6481	0.1263	GRAFT_VERSUS_HOST_DISEASE	0.8435	1.5645	0.0851			NUCLEOTIDE_EXCISION_REPAIR	-0.5886	-1.5733	0.2439	PATHWAYS_IN_CANCER	0.4353	1.7219	0.0963
NOD_LIKE_RECEPTOR_SIGNALING_PATHWAY	-0.6145	-1.6327	0.1011	ASTHMA	0.883	1.5978	0.0873			NOD_LIKE_RECEPTOR_SIGNALING_PATHWAY	-0.6134	-1.5845	0.2772	PROTEASOME	0.6972	2.0337	0.011
RNA_DEGRADATION	-0.6021	-1.6558	0.1496	HEMATOPOIETIC_CELL_LINEAGE	0.7817	1.6002	0.0897			PROTEASOME	-0.6149	-1.559	0.2563	APOPTOSIS	0.5001	1.6715	0.0679
APOPTOSIS	-0.5574	-1.5925	0.1194	NATURAL_KILLER_CELL_MEDIATED_CYTOTOXICITY	0.6089	1.7766	0.0916			RIG_I_LIKE_RECEPTOR_SIGNALING_PATHWAY	-0.5641	-1.529	0.2858	TOLL_LIKE_RECEPTOR_SIGNALING_PATHWAY	0.7173	1.7616	0.0764
RIG_I_LIKE_RECEPTOR_SIGNALING_PATHWAY	-0.5756	-1.5618	0.1323	CELL_ADHESION_MOLECULES_CAMS	0.6929	1.6108	0.1006			SPLICEOSOME	-0.5342	-1.5548	0.2422	CARDIAC_MUSCLE_CONTRACTION	-0.5305	-1.8705	0.0817
MISMATCH_REPAIR	-0.6896	-1.5852	0.1208	CYTOSOLIC_DNA_SENSING_PATHWAY	0.6905	1.7847	0.1721			PROTEIN_EXPORT	-0.6766	-1.5101	0.2929	INTESTINAL_IMMUNE_NETWORK_FOR_IGA_PRODUCTION	0.8145	1.5569	0.0888
PROGESTERONE_MEDIATED_OOCYTE_MATURATION	-0.5217	-1.5325	0.1352	JAK_STAT_SIGNALING_PATHWAY	0.5662	1.6805	0.0807			MISMATCH_REPAIR	-0.6463	-1.4956	0.3116	EPITHELIAL_CELL_SIGNALING_IN_HELICOBACTER_PYLORI_INFECTION	0.5081	1.7101	0.0838
RNA_POLYMERASE	-0.4938	-1.5732	0.129	CHEMOKINE_SIGNALING_PATHWAY	0.6791	1.6861	0.0829			ENDOCYTOSIS	-0.3776	-1.3793	0.375	VIRAL_MYOCARDITIS	0.698	1.6392	0.063
CYTOSOLIC_DNA_SENSING_PATHWAY	-0.6201	-1.6441	0.1188	SYSTEMIC_LUPUS_ERYTHEMATOSUS	0.8575	1.5442	0.088			REGULATION_OF_AUTOPHAGY	-0.5615	-1.4864	0.3176	CYTOSOLIC_DNA_SENSING_PATHWAY	0.6875	1.803	0.098
PENTOSE_AND_GLUCURONATE_INTERCONVERSIONS	-0.7115	-1.6495	0.1409	LEISHMANIA_INFECTION	0.8381	1.5909	0.0821							NATURAL_KILLER_CELL_MEDIATED_CYTOTOXICITY	0.5719	1.6625	0.0671
OOCYTE_MEIOSIS	-0.5268	-1.5587	0.1308	INTESTINAL_IMMUNE_NETWORK_FOR_IGA_PRODUCTION	0.8429	1.5941	0.0828							PRION_DISEASES	0.6556	1.6798	0.0753
NUCLEOTIDE_EXCISION_REPAIR	-0.5824	-1.5721	0.124	EPITHELIAL_CELL_SIGNALING_IN_HELICOBACTER_PYLORI_INFECTION	0.5156	1.7461	0.0551							AUTOIMMUNE_THYROID_DISEASE	0.7534	1.6386	0.0611
SPLICEOSOME	-0.5488	-1.6049	0.1097	CARDIAC_MUSCLE_CONTRACTION	-0.5129	-1.7305	0.1395							P53_SIGNALING_PATHWAY	0.4903	1.6249	0.0666
DRUG_METABOLISM_OTHER_ENZYMES	-0.5217	-1.5427	0.1342	STARCH_AND_SUCROSE_METABOLISM	-0.6687	-1.5716	0.1751							JAK_STAT_SIGNALING_PATHWAY	0.5428	1.5985	0.0755
P53_SIGNALING_PATHWAY	-0.528	-1.5399	0.1317	VIRAL_MYOCARDITIS	0.7069	1.6107	0.0957							TYPE_I_DIABETES_MELLITUS	0.7925	1.5762	0.0854
PORPHYRIN_AND_CHLOROPHYLL_METABOLISM	-0.5532	-1.5583	0.1253	APOPTOSIS	0.5051	1.6764	0.0774							GRAFT_VERSUS_HOST_DISEASE	0.833	1.563	0.0866
CHEMOKINE_SIGNALING_PATHWAY	-0.5212	-1.5318	0.1313	PATHOGENIC_ESCHERICHIA_COLI_INFECTION	0.5099	1.5806	0.0795							ASTHMA	0.8418	1.5478	0.088
STEROID_HORMONE_BIOSYNTHESIS	-0.5413	-1.5233	0.1377	TYPE_I_DIABETES_MELLITUS	0.7909	1.5393	0.087							ANTIGEN_PROCESSING_AND_PRESENTATION	0.6651	1.6587	0.0593
JAK_STAT_SIGNALING_PATHWAY	-0.5182	-1.5066	0.155	CITRATE_CYCLE_TCA_CYCLE	-0.6815	-1.6942	0.1482							BLADDER_CANCER	0.5017	1.57	0.0868
STARCH_AND_SUCROSE_METABOLISM	-0.5383	-1.4928	0.168	LEUKOCYTE_TRANSENDOTHELIAL_MIGRATION	0.5687	1.6003	0.0937							RIG_I_LIKE_RECEPTOR_SIGNALING_PATHWAY	0.5088	1.7057	0.0789
PURINE_METABOLISM	-0.3869	-1.3822	0.2372	ALLOGRAFT_REJECTION	0.8342	1.4999	0.1062							ALLOGRAFT_REJECTION	0.8269	1.5077	0.0966
ENDOCYTOSIS	-0.3555	-1.3178	0.2662	PROPANOATE_METABOLISM	-0.6363	-1.8012	0.0999							TASTE_TRANSDUCTION	-0.5134	-1.5905	0.6571
PANCREATIC_CANCER	-0.4591	-1.4079	0.2379	PROXIMAL_TUBULE_BICARBONATE_RECLAMATION	-0.7038	-1.5718	0.1944							PROTEIN_EXPORT	0.6861	1.7904	0.0862
				PRIMARY_IMMUNODEFICIENCY	0.8231	1.5016	0.1075							LEUKOCYTE_TRANSENDOTHELIAL_MIGRATION	0.549	1.5826	0.0835
				ECM_RECEPTOR_INTERACTION	0.6229	1.5949	0.0855							HEMATOPOIETIC_CELL_LINEAGE	0.7399	1.53	0.086
				HOMOLOGOUS_RECOMBINATION	0.6101	1.7779	0.1207							PRIMARY_IMMUNODEFICIENCY	0.8065	1.4955	0.1015
				SMALL_CELL_LUNG_CANCER	0.5028	1.5835	0.0806							CELL_CYCLE	0.5095	1.6751	0.0737
				RIG_I_LIKE_RECEPTOR_SIGNALING_PATHWAY	0.4833	1.6035	0.0956							PYRIMIDINE_METABOLISM	0.4553	1.6202	0.0676
				FATTY_ACID_METABOLISM	-0.5095	-1.598	0.2006							HOMOLOGOUS_RECOMBINATION	0.5534	1.6604	0.0644
				BLADDER_CANCER	0.5108	1.5583	0.0874							DNA_REPLICATION	0.6899	1.6927	0.0741
				TRYPTOPHAN_METABOLISM	0.4873	1.4626	0.122							MISMATCH_REPAIR	0.6707	1.6588	0.0621
				MISMATCH_REPAIR	0.6721	1.6138	0.1029							PANCREATIC_CANCER	0.4228	1.5447	0.0881
				VALINE_LEUCINE_AND_ISOLEUCINE_DEGRADATION	-0.5428	-1.6116	0.2087							PENTOSE_AND_GLUCURONATE_INTERCONVERSIONS	-0.7309	-1.4693	0.3871
				REGULATION_OF_ACTIN_CYTOSKELETON	0.3413	1.4606	0.1214							PROXIMAL_TUBULE_BICARBONATE_RECLAMATION	-0.6619	-1.5349	0.5286
				GLYCOSAMINOGLYCAN_BIOSYNTHESIS_CHONDROITIN_SULFATE	0.6518	1.5577	0.0828							ASCORBATE_AND_ALDARATE_METABOLISM	-0.7746	-1.485	0.6263
				SELENOAMINO_ACID_METABOLISM	-0.5617	-1.6271	0.2198							GLYCOSAMINOGLYCAN_DEGRADATION	0.5519	1.5507	0.0882
				OXIDATIVE_PHOSPHORYLATION	-0.4768	-1.8595	0.1165							RNA_DEGRADATION	0.5	1.6978	0.0778
				DNA_REPLICATION	0.6704	1.5777	0.079							STARCH_AND_SUCROSE_METABOLISM	-0.6138	-1.4459	0.2909
				BUTANOATE_METABOLISM	-0.5995	-1.5834	0.1976							BASAL_TRANSCRIPTION_FACTORS	0.4598	1.6421	0.0641
				MAPK_SIGNALING_PATHWAY	0.3111	1.3555	0.1904							GLYCOSAMINOGLYCAN_BIOSYNTHESIS_CHONDROITIN_SULFATE	0.6304	1.5303	0.0877
				GLYCOSAMINOGLYCAN_DEGRADATION	0.5498	1.5329	0.0888							FC_GAMMA_R_MEDIATED_PHAGOCYTOSIS	0.515	1.543	0.0872
				INSULIN_SIGNALING_PATHWAY	-0.3487	-1.4226	0.3368							PATHOGENIC_ESCHERICHIA_COLI_INFECTION	0.4811	1.5388	0.0877
				FC_GAMMA_R_MEDIATED_PHAGOCYTOSIS	0.5407	1.589	0.0803							TRYPTOPHAN_METABOLISM	0.4687	1.3776	0.1909
				B_CELL_RECEPTOR_SIGNALING_PATHWAY	0.6369	1.5549	0.0831							VIBRIO_CHOLERAE_INFECTION	0.3927	1.5306	0.0895
				FC_EPSILON_RI_SIGNALING_PATHWAY	0.4889	1.5125	0.1004							NITROGEN_METABOLISM	-0.5879	-1.4464	0.3119
				PROTEIN_EXPORT	0.6328	1.6192	0.1034							ECM_RECEPTOR_INTERACTION	0.5897	1.5112	0.0954
				UBIQUITIN_MEDIATED_PROTEOLYSIS	0.3602	1.4894	0.112							ACUTE_MYELOID_LEUKEMIA	0.4696	1.5207	0.0906
				P53_SIGNALING_PATHWAY	0.4224	1.4235	0.1466							PROPANOATE_METABOLISM	-0.5451	-1.5556	0.5941
				ACUTE_MYELOID_LEUKEMIA	0.49	1.5578	0.0851							PURINE_METABOLISM	0.3237	1.3757	0.1899
				LYSOSOME	0.4311	1.5429	0.0868							PORPHYRIN_AND_CHLOROPHYLL_METABOLISM	-0.5681	-1.4646	0.3599
